# Supplementary material
Source: PubMed Central journal article supplement (PMC4385437)

**Supplemental Table 1. Assessment of bias in the included randomized controlled trials including assessments of randomization, allocation concealment, blinding, data reporting, and declaration of conflicts of interest.**

| Authors              | Randomization                           | Allocation concealment | Blinding of participants | Blinding of outcomes | Complete data reporting | Analysis type   | Conflicts of interest or pharma sponsorship | Trial Registry |
|----------------------|-----------------------------------------|------------------------|--------------------------|----------------------|-------------------------|-----------------|---------------------------------------------|----------------|
| Sohn et al. 1999     | Permuted block design                   | None                   | None                     | None                 | No                      | Per protocol    | Not stated                                  | Not stated     |
| Williams et al. 2001 | Sealed envelope technique               | None                   | None                     | None                 | No                      | Per protocol    | Not stated                                  | Not stated     |
| Fanchin et al. 2001  | Not stated                              | None                   | None                     | None                 | No                      | Per protocol    | Not stated                                  | Not stated     |
| Baruffi et al. 2003  | Drawing lots, using randomization table | None                   | None                     | None                 | No                      | Per protocol    | Not stated                                  | Not stated     |
| Mochtar et al. 2006  | Sealed envelope                         | None                   | None                     | None                 | Yes                     | Intent to treat | Not stated                                  | Not stated     |

1

2

1 **Supplemental Figure 1: PRISMA flow diagram of study selection.**

2

3

4

5

6

7

8

9

10

11

12

13

14

15

16

ACCEPTED MANUSCRIPT

1

2 **Supplemental Addendum: Detailed MEDLINE search strategy.**

3 (((fertilization in vitro[majr] OR IVF[tiab] OR "in-vitro fertilization"[tiab] OR "in-vitro fertilization"[tiab] OR  
4 "assisted reproduction"[tiab] OR "oocyte retrieval"[tiab] OR oocytes/drug effects[majr]) AND ("progesterone  
5 luteal support"[tiab] OR "luteal phase support"[tiab] OR progesterone[majr] OR progesterone[tiab] OR  
6 "intravaginal progesterone"[tiab] OR "vaginal progesterone"[tiab] OR "progesterone vaginal"[tiab] OR  
7 "intramuscular\* progesterone"[tiab])) OR (((fertilization in vitro[majr] OR IVF[tiab] OR "in-vitro  
8 fertilization"[tiab] OR "in-vitro fertilization"[tiab] OR "assisted reproduction"[tiab] OR "oocyte retrieval"[tiab] OR  
9 oocytes/drug effects[majr] OR "assisted reproduction") AND (luteal phase[mh] OR luteal cells[mh]) AND  
10 (progesterone[majr] OR progesterone[tiab] OR "intravaginal progesterone"[tiab] OR "vaginal  
11 progesterone"[tiab] OR "progesterone vaginal"[tiab] OR "intramuscular\* progesterone"[tiab]))) AND (  
12 "1990/01/01"[PDat] : "2014/12/31"[PDat] ) AND Humans[Mesh] AND English[lang])

13

**Evaluation of articles included in analysis**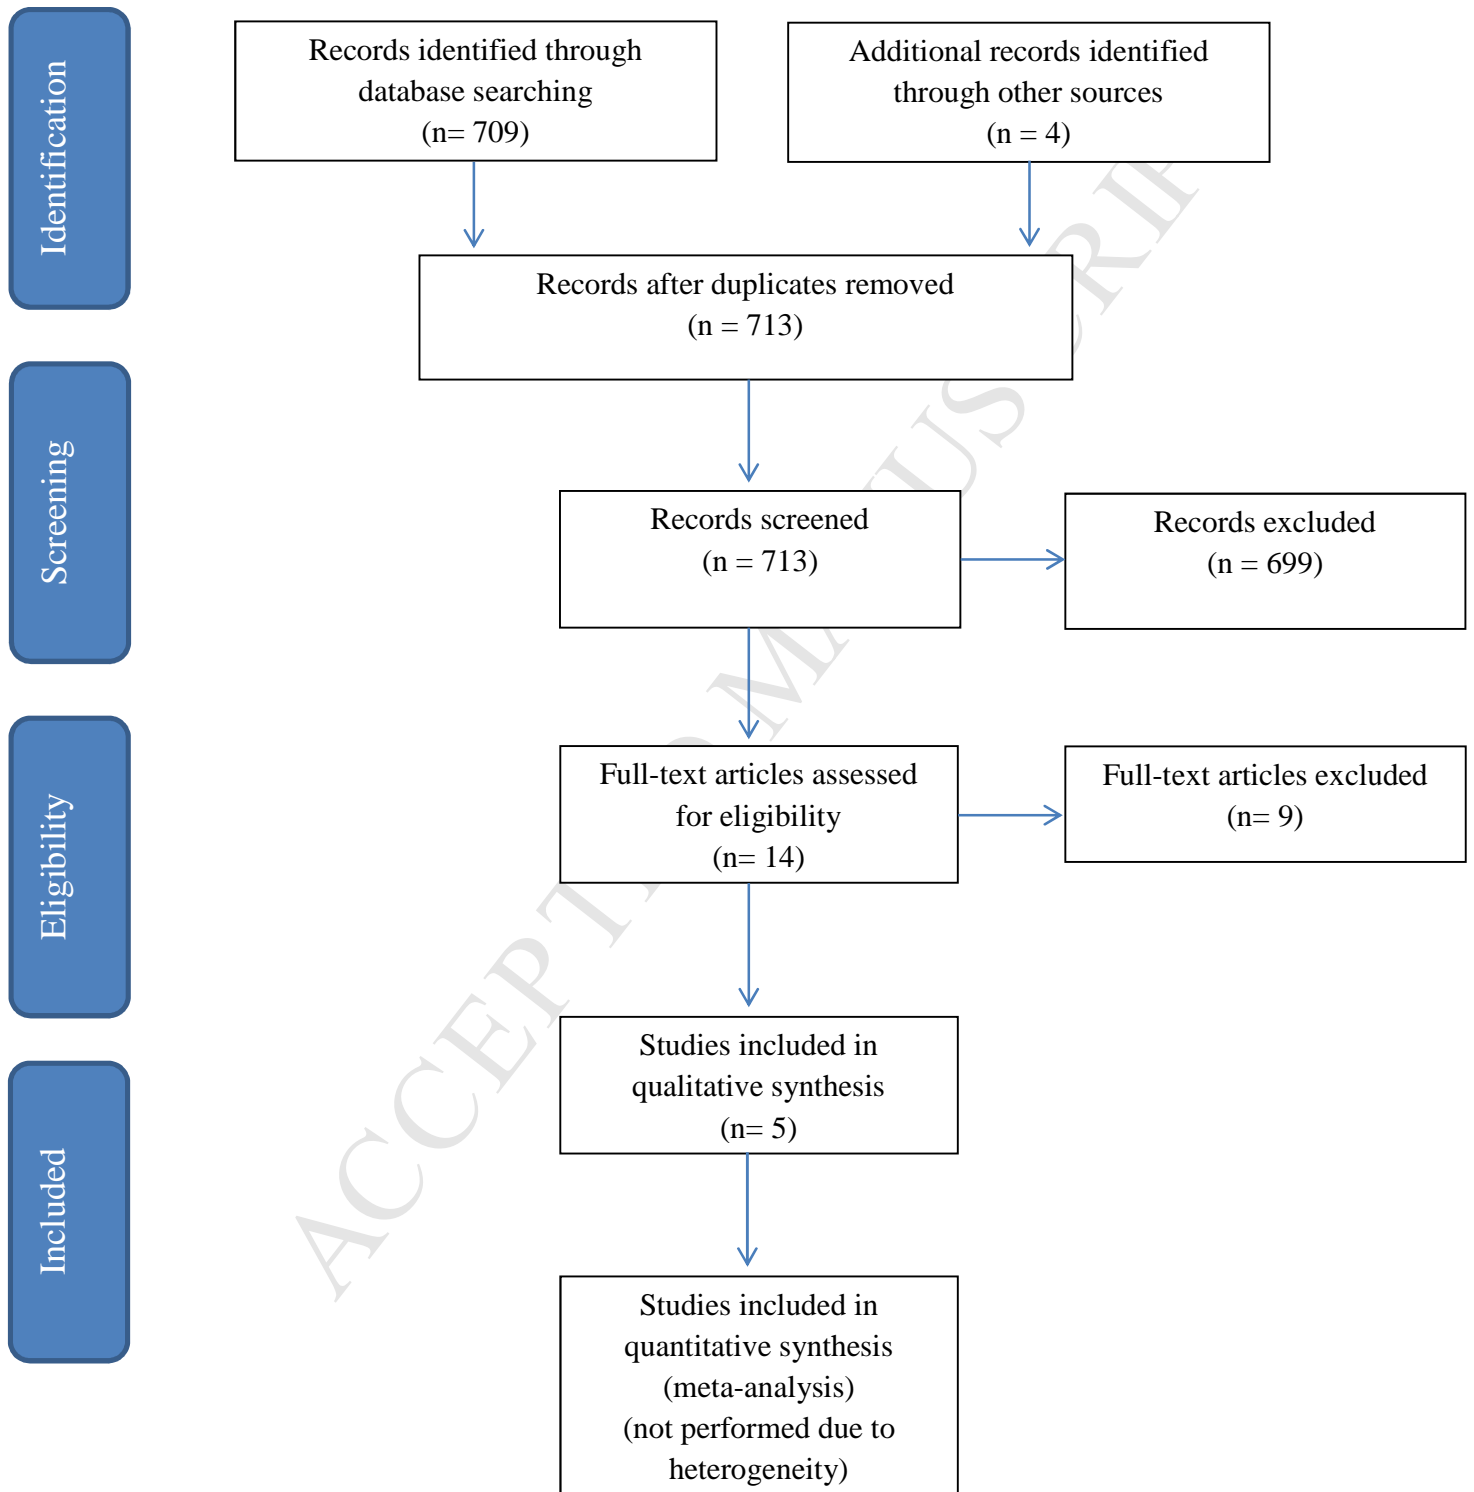

Supplement: NIHMS653596-supplement-supplement_1.pdf [file NIHMS653596-supplement-supplement_1.pdf]
